# Supplementary material
Source: HighWire-hosted journal article supplement (https://jnnp.bmj.com/content/92/12/1319)
Supplement: inline-supplementary-material-1 [file inline-supplementary-material-1.pdf]

## Supplementary data

Supplementary Table 1 Baseline Advanced MRI metrics

| Variable                                                                 | MS Patients | Healthy Controls |
|--------------------------------------------------------------------------|-------------|------------------|
| Mean Whole Brain NAWM AD, $\times 10^{-3}\text{mm}^2/\text{s}$           | 1.17 (0.02) | 1.16 (0.02)      |
| Mean Whole Brain NAWM RD*, $\times 10^{-3}\text{mm}^2/\text{s}$          | 0.62 (0.03) | 0.59 (0.02)      |
| Mean Whole Brain NAWM MD*, $\times 10^{-3}\text{mm}^2/\text{s}$          | 0.8 (0.02)  | 0.78 (0.02)      |
| Mean Whole Brain NAWM FA*                                                | 0.39 (0.02) | 0.41 (0.01)      |
| Mean OR NAWM AD, $\times 10^{-3}\text{mm}^2/\text{s}$                    | 1.23 (0.04) | 1.24 (0.02)      |
| Mean OR NAWM RD*, $\times 10^{-3}\text{mm}^2/\text{s}$                   | 0.61 (0.04) | 0.56 (0.02)      |
| Mean OR NAWM MD*, $\times 10^{-3}\text{mm}^2/\text{s}$                   | 0.82 (0.03) | 0.79 (0.01)      |
| Mean OR NAWM FA*                                                         | 0.43 (0.03) | 0.48 (0.02)      |
| Mean Whole Brain Chronic lesion AD, $\times 10^{-3}\text{mm}^2/\text{s}$ | 1.47 (0.11) |                  |
| Mean Whole Brain Chronic lesion RD, $\times 10^{-3}\text{mm}^2/\text{s}$ | 0.88 (0.12) |                  |
| Mean Whole Brain Chronic lesion MD, $\times 10^{-3}\text{mm}^2/\text{s}$ | 1.08 (0.11) |                  |
| Mean Whole Brain Chronic lesion FA                                       | 0.34 (0.04) |                  |
| Mean OR Chronic lesion AD, $\times 10^{-3}\text{mm}^2/\text{s}$          | 1.56 (0.10) |                  |
| Mean OR Chronic lesion RD, $\times 10^{-3}\text{mm}^2/\text{s}$          | 0.87 (0.09) |                  |
| Mean OR Chronic lesion MD, $\times 10^{-3}\text{mm}^2/\text{s}$          | 1.10 (0.08) |                  |
| Mean OR Chronic lesion FA                                                | 0.38 (0.04) |                  |

\*Statistically significant between patient and controls ( $P < 0.002$ ), independent-samples T test. NAWM: Normal Appearing White Matter, AD: Axial Diffusivity, RD: Radial Diffusivity, MD: Mean diffusivity, FA: Fractional Anisotropy, OR: Optic Radiation

Supplementary Table 2 Longitudinal measurements

| Variable                                   | MS Patients       |                   |                   |                   | Healthy Controls |                  |                  |                  |
|--------------------------------------------|-------------------|-------------------|-------------------|-------------------|------------------|------------------|------------------|------------------|
|                                            | 1                 | 2                 | 3                 | 4                 | 1                | 2                | 3                | 4                |
| Time Points                                |                   |                   |                   |                   |                  |                  |                  |                  |
| Mean EDSS (SD)                             | 2.88<br>(1.40)    | 2.51<br>(1.29)    | 2.21<br>(1.62)    | 2.24<br>(1.53)    |                  |                  |                  |                  |
| Mean MARS (SD)                             | 1.63<br>(0.20)    | 1.69<br>(0.19)    | 1.70<br>(0.21)    | 1.70<br>(0.21)    | 1.76<br>(0.12)   | 1.81<br>(0.07)   | 1.82<br>(0.07)   | 1.80<br>(0.08)   |
| Mean RNFL thickness (SD) [mm]              | 84.2<br>(9.96)    | 83.72<br>(9.67)   | 84.33<br>(10.19)  | 85.04<br>(9.80)   | 91.77<br>(8.08)  | 91.58<br>(8.67)  | 91.75<br>(8.72)  | 90.70<br>(8.45)  |
| Mean RNFL thickness (SD) [mm], ON eyes     | 78.23<br>(11.17)  | 80.49<br>(11.03)  | 78.95<br>(10.35)  | 80.52<br>(10.89)  |                  |                  |                  |                  |
| Mean RNFL thickness (SD) [mm], non-ON eyes | 91.78<br>(8.19)   | 91.64<br>(8.79)   | 91.87<br>(8.83)   | 90.70<br>(8.45)   |                  |                  |                  |                  |
| Mean mfVEP Latency (SD) [ms]               | 162.94<br>(15.31) | 161.45<br>(15.06) | 161.26<br>(15.12) | 161.18<br>(15.5)  | 150.14<br>(6.27) | 149.94<br>(6.36) | 149.97<br>(6.51) | 150.56<br>(5.69) |
| Mean mfVEP Latency (SD) [ms], ON eyes      | 167.92<br>(15.57) | 167.38<br>(15.55) | 167.62<br>(15.70) | 166.92<br>(16.01) |                  |                  |                  |                  |
| Mean mfVEP Latency (SD) [ms], non-ON eyes  | 150.14<br>(6.36)  | 149.97<br>(6.45)  | 149.97<br>(6.41)  | 150.63<br>(5.76)  |                  |                  |                  |                  |
| Mean OR normalized lesional AD             | 1.28<br>(0.11)    | 1.28<br>(0.12)    | 1.30<br>(0.12)    | 1.32<br>(0.12)    |                  |                  |                  |                  |
| Mean OR normalized lesional RD             | 1.41<br>(0.15)    | 1.41<br>(0.16)    | 1.42<br>(0.17)    | 1.44<br>(0.16)    |                  |                  |                  |                  |
| Mean OR normalized lesional MD             | 1.34<br>(0.12)    | 1.35<br>(0.12)    | 1.36<br>(0.12)    | 1.38<br>(0.12)    |                  |                  |                  |                  |
| Mean OR normalized lesional FA             | 0.89<br>(0.11)    | 0.90<br>(0.12)    | 0.91<br>(0.13)    | 0.91<br>(0.12)    |                  |                  |                  |                  |
